# Supplementary material
Source: publisher figshare collection journal article supplement (https://gsajournals.figshare.com/articles/dataset/_/14176727)
Supplement: Supplementary file 1 [file 1]

## Sheet: Sheet1
Table S2
Strain	Genotype	Source
FY254	h- can1-1 leu1-32 ade6-M210 ura4-D18	Our stock
FY255	h+ can1-1 leu1-32 ade6-M210 ura4-D18	Our stock
FY527	h- his3-D1 ade6-M216 ura4-D18 leu1-32	Our stock
FY528	h+ his3-D1 ade6-M210 ura4-D18 leu1-32	Our stock
FY421	h- ade6-704 leu1-32 ura4-D18 ∆chk1::ura4	Our stock
FY4743	h- rad11-Cerulean::hphMX rad22-YFP-natMX leu1-32 ade6-M210 ura4-D18	Our stock
FY8927	h90 mst1-L344S-5FLAG:hphMX6 rad11-Cerulean::hphMX rad22-YFP-natMX leu1-32 ura4-D18	This study
FY1106	h+ ∆rad3::ura4+ ura4-D18 leu1-32 ade6-M210	Our stock
FY1204	h+ ∆rhp51::ura4+ ade6-704 leu1-32 ura4-D18	Our stock
FY1353	h+ leu1-32 ura4-D18 his3-D1 ade6-M210 pku70::kanr	Our stock
FY2396	h- ∆mst1::ura4+ leu1::nmt-mst1L-S leu1+ ura4-D18 ade6-M210	Our stock
FY2449	h+ ∆mst1::kanMX6 leu1::nmt-mst1L-S-leu1+ ura4-D18 ade6-M210	Our stock
FY2450	h- ∆mst1::kanMX6 leu1::nmt-mst1L-S-leu1+ ura4-D18 ade6-M210	Our stock
FY2504	h- ∆rhp9::ura4+ (=crb2) mst1::kanMX6 leu1::nmt-mst1L-S-leu1+ ura4-D18 leu1-32 ade6-M21?	This study
FY2643	h- ∆chk1::ura4+ ∆mst1::kanMX6 leu1::nmt-mst1L-S-leu1+ ura4-D18 ade6-M210 or 704	Our stock
FY2725	h- ∆pku70::kanr ∆mst1::ura4+ leu1::nmt-mst1L-S leu1+ ura4-D18 ade6-M210	Our stock
FY2726	h- ∆pku70::kanr ∆mst1::ura4+ leu1::nmt-mst1L-S leu1+ ura4-D18 ade6-M210	Our stock
FY3135	h- ade6-M210 leu1-32 ura4-D18 hip1::ura4+	Simon Whitehall
FY3151	h- ∆mrc1::ura4+ ura4-D18 leu1-32 his7-366	Our stock
FY3439	h- ura4-D18 leu1-32 ade6-M216 his3-D1 ∆rhp9::ura4+ (=crb2)	Our stock
FY3562	h+ ∆mst1::kanMX6 leu1::nmt-mst1L-S-leu1+ ade6-M210 ura4-D18 ∆hip1::ura4+	Our stock
FY3857	h+ ∆rhp51::ura4+ ∆mst1::kanMX6 leu1::nmt-mst1L-S leu1+ura4-D18 leu1-32	This study
FY3884	h- exo1::ura4 ura4-D18	Mathew O’Connell
FY4713	h- ∆mst1::kanMX6 ∆mrc1::ura4+ leu1::nmt-mst1L-S-leu1+ ura4-D18 ade6-M210 leu1-32	This study
FY5304	h+ ∆mst1::kanMX6 leu1::nmt-mst1L-S-leu1+ exo1::ura4+ ura4-D18 leu1-32	This study
FY5311	h+ pht1-4KtoR-3HA-KanMX6 ura4-D18 leu1-32 ade6-M216 his3-D1	Michael Keogh
FY6024	h+ mst1-L344S-5FLAG:hphMX6 leu1-32 ura4-D18	Eishi Noguchi
FY6229	h- leu1-32 ura4-D18 ade6-M26 int::pUC8/ura4+/MATa/ade6-L469 his3-D1 ade6-M216	Our stock
FY6632	h- pku70::kanr his3-D1 ura4-D18 leu1-32 ade6-M216	Our stock
FY8929	h- mst1-L344S-5FLAG:hphMX6 leu1-32 ura4-D18 ade6-M26 int::pUC8/ura4+/MATa/ade6-L469 his3-D1 ade6-M216	This study
FY9153	h+ pht1::ura4 rad11-Cerulean::hphMX rad22-YFP-natMX leu1-32 ade6-M210 ura4-D18	Our stock
FY9154	h+ pht1-4KtoR-3HA-KanMX6 rad11-Cerulean::hphMX rad22-YFP-natMX ura4-D18 leu1-32 ade6-M216/210 his3-D1?	This study
FY9338	h- mst1-L344S-5FLAG:hphMX6 pku70::kanr rad11-Cerulean::hphMX rad22-YFP-natMX leu1-32 ura4-D18 his3-D1? ade6-M210	This study
FY9352	h- pku70::kanr rad11-Cerulean::hphMX rad22-YFP-natMX leu1-32 ura4-D18 his3-D1? ade6-M210	This study
FY8989	h- rad54-GFP:hphMX6	Takuro Nakagawa
FY9023	h- mst1-L344S-5FLAG:hphMX6 rad54-GFP:hphMX6 leu1-32? ura4-D18?	This study
FY9340	h- pku70::kanr rad54-GFP:hphMX6 leu1-32? his3-D1? ade6-M210?	This study
FY9353	h- mst1-L344S-5FLAG:hphMX6 pku70::kanr rad54-GFP:hphMX6 leu1-32? his3-D1? ade6-M210?	This study
FY7479	h- arg3::HOsite-natMX ars1::p41nmt1-HO(his3+) lys1-131::pdis1-mCherry-lacI(lys1+) erg7ter::lacO(ura4+) rad52-tandemCFP::kanMX leu1-32 his3-D1 ura4-294	Li-Lin Du
FY8992	h- mst1-L344S-5FLAG:hphMX6 arg3::HOsite-natMX ars1::p41nmt1-HO(his3+) lys1-131::pdis1-mCherry-lacI(lys1+) erg7ter::lacO(ura4+) rad52-tandemCFP::kanMX leu1-32 his3-D1 ura4-294/D18?	This study
FY4620	h- chk1HA(ep) cds1-myc::KanMX ade6-M216 ura4-D18 leu1-32	Our stock
FY9495	h+ exo1∆::hph arg3::HOsite-natMX ars1::p41nmt1-HO(his3+) lys1-131::pdis1-mCherry-lacI(lys1+) erg7ter::lacO(ura4+) rad52-tandemCFP::kanMX leu1-32 his3-D1 ura4-294	This study
FY9499	h- pku70::kanr arg3::HOsite-natMX ars1::p41nmt1-HO(his3+) lys1-131::pdis1-mCherry-lacI(lys1+) erg7ter::lacO(ura4+) rad52-tandemCFP::kanMX leu1-32 his3-D1 ura4-294/D18 ade6-M210?	This study
FY9502	h- pht1-4KtoR-3HA-KanMX6 arg3::HOsite-natMX ars1::p41nmt1-HO(his3+) lys1-131::pdis1-mCherry-lacI(lys1+) erg7ter::lacO(ura4+) rad52-tandemCFP::kanMX leu1-32 his3-D1 ura4-294/D18?	This study
FY9514	h+ exo1∆::hph mst1-L344S-5FLAG:hphMX6 arg3::HOsite-natMX ars1::p41nmt1-HO(his3+) lys1-131::pdis1-mCherry-lacI(lys1+) erg7ter::lacO(ura4+) rad52-tandemCFP::kanMX leu1-32 his3-D1 ura4-294	This study
FY9542	h- pku70::kanr mst1-L344S-5FLAG:hphMX6 arg3::HOsite-natMX ars1::p41nmt1-HO(his3+) lys1-131::pdis1-mCherry-lacI(lys1+) erg7ter::lacO(ura4+) rad52-tandemCFP::kanMX leu1-32 his3-D1 ura4-294/D18 ade6-M210?	This study
FY5083	h- ∆mst1::kanMX6 leu1::nmt-mst1L-S-leu1+ chk1HA(ep) cds1-myc::KanMX ura4-D18 ade6-M210/216?	This study
FY3397	h- leu1-32 ura4-D18 ade6-M210 his3-D1 hta1-S129A:ura4+ hta2-S128A:his3+	Takuro Nakagawa
FY5548	h- ura4-D18 leu1-32 his3-D1 ade6-M210 mst1::[mst1-V5 leu1+] rad22-YFP::hphMX arg3::HOsite(KanMX4) ars1::nmt41-HOendonuclease:ampR:his3+:ars1	Our stock
FY9561	h- clr4::kanMX6-Bioneer mst1::[mst1-V5 leu1+] rad22-YFP::hphMX arg3::HOsite(KanMX4) ars1::nmt41-HOendonuclease:ampR:his3+:ars1his3-D1 ura4-D18 leu1-32 ade6-M210	This study
